# Supplementary material for: Excitation wavelength-dependent room-temperature phosphorescence: unusual properties of novel phosphinoamines
Source: Royal Society of Chemistry journal article supplement (doi:10.1039/d1me00117e), 2021-01-01
Supplement: d1me00117e1.pdf [file d1me00117e1.pdf]

## Supporting information

### Content

|                                                                  |    |
|------------------------------------------------------------------|----|
| Powder X-Ray diffraction data.....                               | 1  |
| Geometry parameters .....                                        | 2  |
| RDG analysis .....                                               | 5  |
| Single point calculations with periodic boundary conditions..... | 6  |
| DFT calculation of Frank-Condon excitation processes.....        | 6  |
| Experimental photophysical properties .....                      | 19 |
| DFT calculation of relaxation processes .....                    | 21 |
| Spin-orbital coupling matrix coefficients.....                   | 23 |
| Single-crystal X-Ray diffraction data.....                       | 25 |

### Powder X-Ray diffraction data

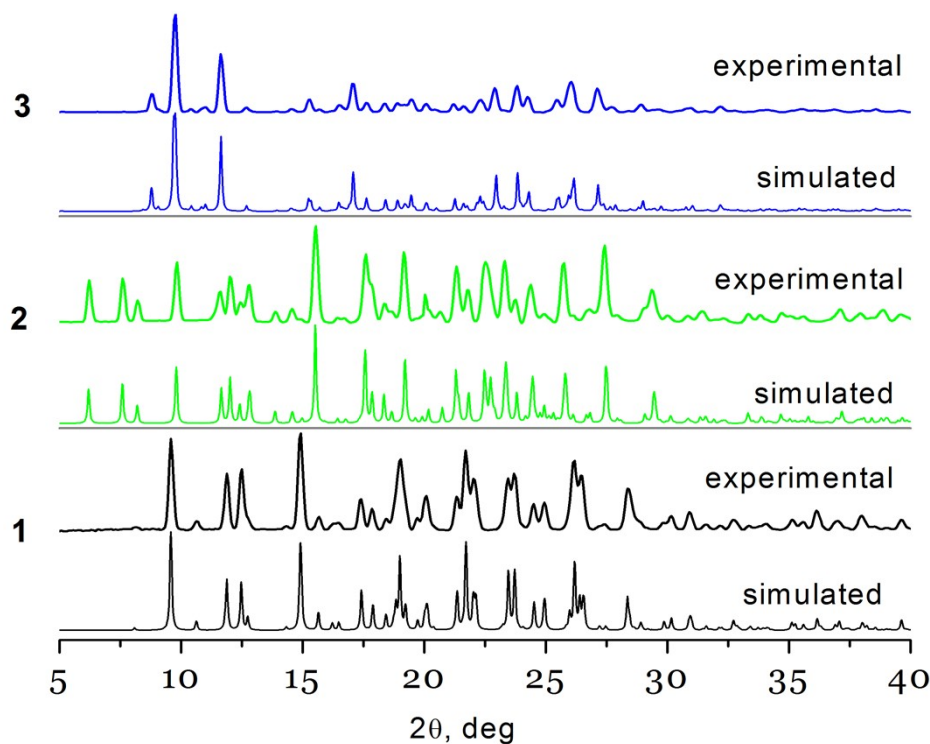

Figure S1 – Experimental (top) and simulated (bottom) PXRD patterns for **1** (black), **2** (green) and **3** (blue).

## Geometry parameters

Table S1 – Experimental hydrogen bond characteristics for compounds **1–3**. *D* is a donor atom, *A* is an acceptor atom.

|          | <i>D</i> | H   | <i>A</i> | <i>D</i> –H, Å | H··· <i>A</i> , Å | <i>D</i> ··· <i>A</i> , Å | <i>D</i> –H··· <i>A</i> , deg |
|----------|----------|-----|----------|----------------|-------------------|---------------------------|-------------------------------|
| <b>1</b> | N2       | H2  | N1       | 0.850(13)      | 2.009(15)         | 2.7167(16)                | 140.2(15)                     |
|          | N12      | H12 | N11      | 0.871(9)       | 1.950(13)         | 2.6944(17)                | 142.6(16)                     |
| <b>2</b> | N22      | H22 | N21      | 0.871(9)       | 2.025(13)         | 2.7513(17)                | 140.1(16)                     |
|          | N12      | H12 | N11      | 0.873(9)       | 1.941(15)         | 2.669(2)                  | 139.9(18)                     |
| <b>3</b> | N22      | H22 | N21      | 0.875(9)       | 1.956(15)         | 2.694(2)                  | 141.2(18)                     |

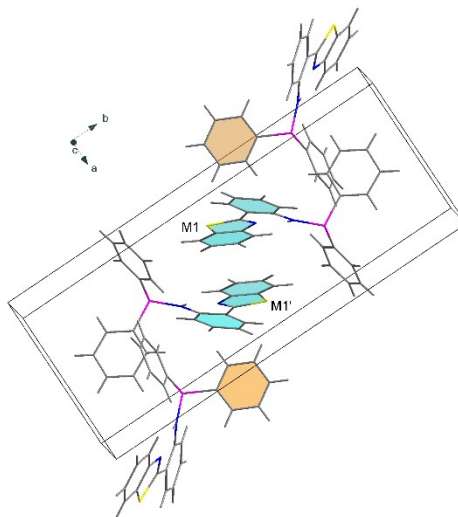

Fig. S2 – A fragment of crystal packing for compound **1** showing parallel arrangement of *pbt* moieties highlighted turquoise. Phenyl groups capping the pair of parallel *pbts* are highlighted orange. *pbt* moiety is denoted as M1, crystallographically related one is denoted with an apostrophe.

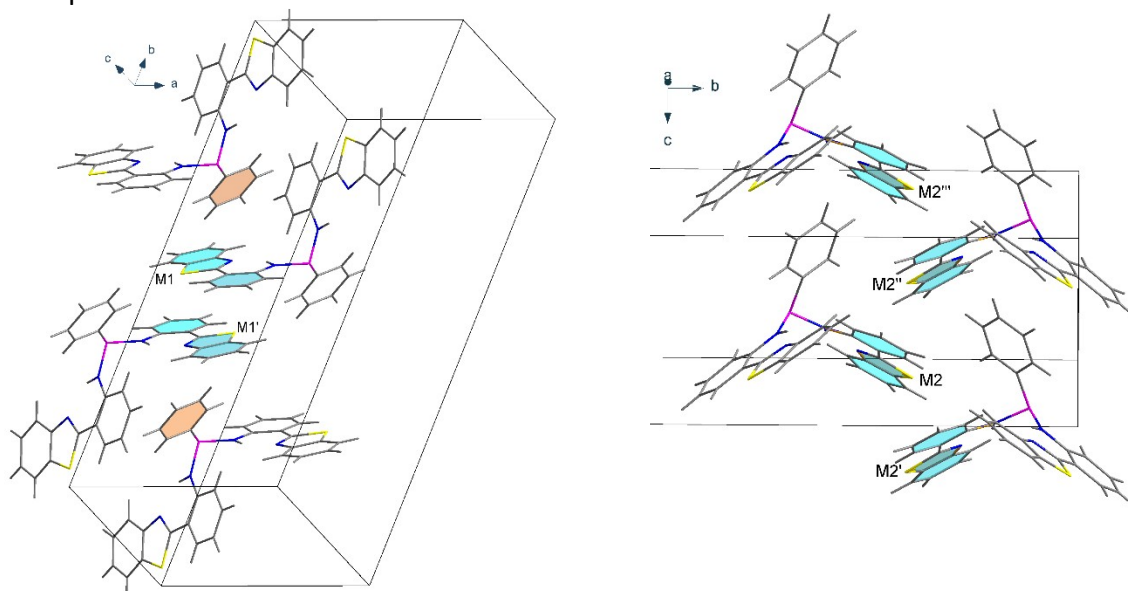

Fig. S3 – A fragment of crystal packing for compound **2** showing parallel (left) and inclined (right) arrangement of *pbt* moieties highlighted turquoise. Phenyl groups capping the pair of parallel *pbts* via T-shaped C–H··· $\pi$  contacts are highlighted orange. Crystallographically independent *pbt* moieties are denoted as M1–M2; crystallographically related ones are denoted with an apostrophe.

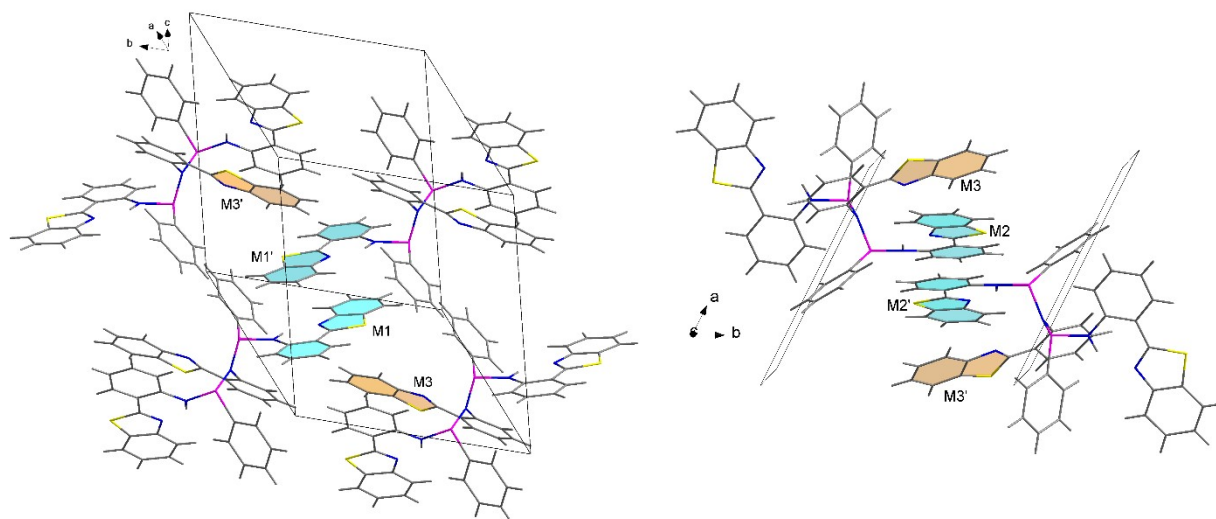

Fig. S4 – A fragment of crystal packing for compound **3** showing parallel arrangement of different *pbt* moieties highlighted turquoise. Moieties capping the pair of parallel *pbt*s via T-shaped C–H $\cdots$  $\pi$  contacts are highlighted orange. Crystallographically independent *pbt* moieties are denoted as M1–M3; crystallographically related ones are denoted with an apostrophe.

Table S2 – Experimental characteristics of  $\pi$ - $\pi$  contacts for **1–3**: intercentroid distance between heterocycles ( $Mn$ – $Mn'$ ), shortest C–H $\cdots$ heterocyclic center distance ( $Mn$ –Ar), dihedral angle between heterocyclic planes ( $Mn$ – $Mn'$ ), dihedral angle between heterocyclic and aryl planes ( $Mn$ –Ar);  $n$  is *pbt* unit number.

|             | <b>1</b> |       | <b>2</b>      |               | <b>3</b>               |                        |
|-------------|----------|-------|---------------|---------------|------------------------|------------------------|
|             | M1–M1'   | M1–Ar | $Mn$ – $Mn'$  | $Mn$ –Ar      | $Mn$ – $Mn'$           | $Mn$ –Ar               |
| distance, Å | 3.87     | 3.07  | 3.69,<br>4.63 | 3.33,<br>3.32 | 3.74,<br>3.44,<br>6.29 | 3.02,<br>4.32,<br>3.79 |
| angle, deg  | 0        | 89.1  | 0,<br>60.7    | 45.9,<br>60.7 | 0,<br>0,<br>45.6       | 43.6,<br>19.7,<br>37.8 |

Table S3 – Selected geometry parameters for experimental and optimized structures in the ground state

|                  | 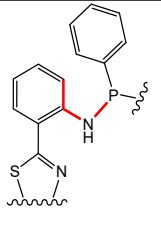 |  |  |  |  | NH, Å        |
|------------------|-----------------------------------------------------------------------------------|-----------------------------------------------------------------------------------|-----------------------------------------------------------------------------------|------------------------------------------------------------------------------------|-------------------------------------------------------------------------------------|--------------|
| <b>1</b>         |                                                                                   |                                                                                   |                                                                                   |                                                                                    |                                                                                     |              |
| DFT in gas phase | 13.05                                                                             | 1.32                                                                              | 99.82, 157.13                                                                     | 126.43                                                                             | 96.14, 103.19                                                                       | 1.022        |
| Periodic DFT     | 4.48                                                                              | 16.55                                                                             | 98.17, 158.77                                                                     | 123.46                                                                             | 99.63, 101.17                                                                       | 1.101        |
| Experimental     | 7.73                                                                              | 13.76                                                                             | 101.35, 154.65                                                                    | 124.87                                                                             | 100.15, 103.03                                                                      | 0.849        |
| <b>2</b>         |                                                                                   |                                                                                   |                                                                                   |                                                                                    |                                                                                     |              |
| DFT in gas phase | 15.69, 28.51                                                                      | 0.31, 15.48                                                                       | 58.47, 165.98                                                                     | 123.57, 131.83                                                                     | 97.60, 102.34                                                                       | 1.020, 1.021 |
| Periodic DFT     | 0.04, 0.76                                                                        | 1.53, 2.19                                                                        | 45.64, 152.26                                                                     | 128.67, 130.84                                                                     | 95.81, 98.16                                                                        | 1.098, 1.103 |
| Experimental     | 2.02, 3.03                                                                        | 3.40, 4.12                                                                        | 51.64, 144.26                                                                     | 127.62, 131.92                                                                     | 97.23, 100.96                                                                       | 0.870, 0.872 |
| <b>3</b>         |                                                                                   |                                                                                   |                                                                                   |                                                                                    |                                                                                     |              |
| DFT in gas phase | 21.62, 32.08, 79.86, 77.09                                                        | 10.77, 23.44, 174.14                                                              | 40.08, 40.93, 150.39, 171.49                                                      | 124.95, 122.00, 121.61, 123.05                                                     | 96.00, 98.39, 101.79, 102.46                                                        | 1.018, 1.023 |
| Periodic DFT     | 18.49, 23.55, 74.19, 80.12                                                        | 2.35, 2.96, 13.00                                                                 | 33.95, 41.59, 148.16, 158.22                                                      | 122.74, 123.76, 124.02, 124.12                                                     | 96.95, 97.95, 100.43, 102.28                                                        | 1.112        |
| Experimental     | 7.53, 12.58, 79.52, 84.64                                                         | 0.97, 1.45, 161.45                                                                | 33.60, 42.33, 149.49, 157.94                                                      | 126.40, 121.50, 122.72, 125.76                                                     | 95.69, 98.82, 103.32, 101.51,                                                       | 0.880        |

## RDG analysis

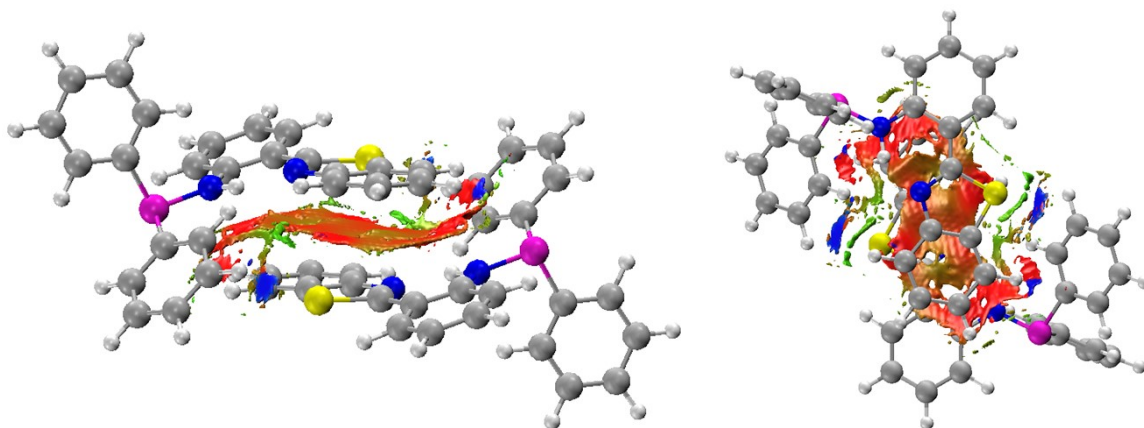

Figure S5 – Two projections of plot of  $\text{sign}(\lambda_2) \cdot \rho$  mapped over the RDG for **1** (isovalue  $s = 0.5$ ,  $-0.01 \text{ a.u.} < \text{sign}(\lambda_2) \cdot \rho < 0.01 \text{ a.u.}$ , isosurfaces colored via red-green-blue scale, where red – attractive, blue – repulsive).

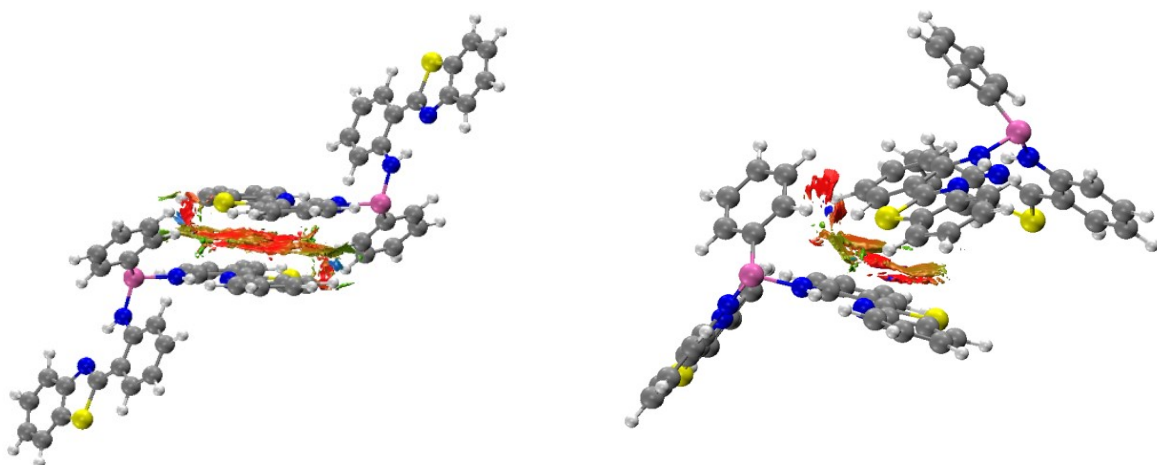

Figure S6 – Plot of  $\text{sign}(\lambda_2) \cdot \rho$  mapped over the RDG for two fragments of **2** (isovalue  $s = 0.5$ ,  $-0.01 \text{ a.u.} < \text{sign}(\lambda_2) \cdot \rho < 0.01 \text{ a.u.}$ , isosurfaces colored via red-green-blue scale, where red – attractive, blue – repulsive).

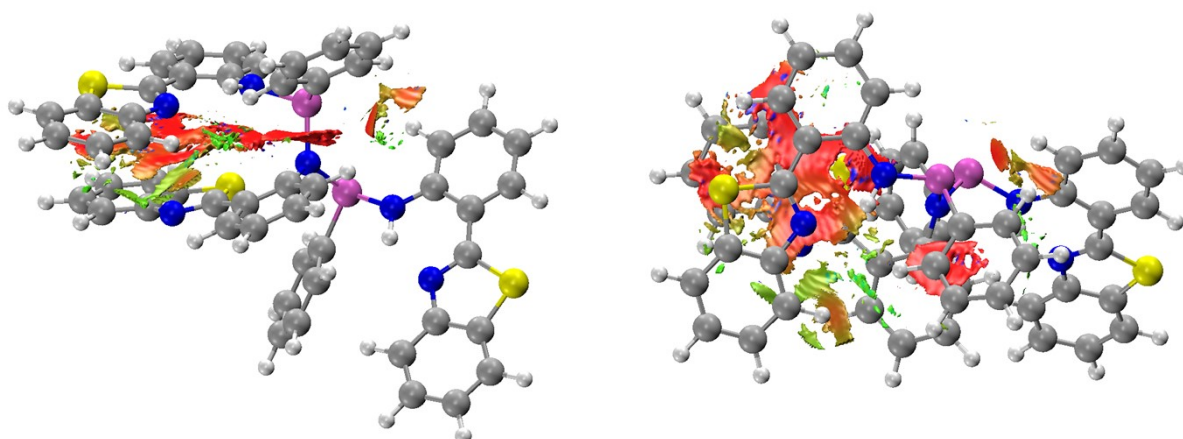

Figure S7 – Two projections of plot of  $\text{sign}(\lambda_2) \cdot \rho$  mapped over the RDG for **3** (isovalue  $s = 0.5$ ,  $-0.01 \text{ a.u.} < \text{sign}(\lambda_2) \cdot \rho < 0.01 \text{ a.u.}$ , isosurfaces colored via red-green-blue scale, , where red – attractive, blue – repulsive).

## Single point calculations with periodic boundary conditions

Table S4 – HOCO-LUCO energies (PBE0-D3/DZVP-MOLOPT-SR-GTH) and onset optical gaps

| Compound | HOCO-LUCO, eV | Optical gap, eV |
|----------|---------------|-----------------|
| 1        | 3.59          | 2.92            |
| 2        | 3.30          | 2.91            |
| 3        | 3.21          | 2.88            |

## DFT calculation of Frank-Condon excitation processes

Table S5 – Main excitation transitions of **1** in the ground state (TD-B2PLYP for singlets and TDA-B2PLYP for triplets). H – HOMO, L – LUMO

| State          | Wavelength, nm | Energy, eV | Oscillator strength | Transition                                                                                          | Contribution                                                                           |
|----------------|----------------|------------|---------------------|-----------------------------------------------------------------------------------------------------|----------------------------------------------------------------------------------------|
| S <sub>1</sub> | 369.6          | 3.355      | 0.2190              | H → L                                                                                               | 0.9769                                                                                 |
| S <sub>2</sub> | 301            | 4.119      | 0.0335              | H-2 → L<br>H-1 → L<br>H-1 → L+1<br>H → L+1                                                          | 0.0159<br>0.3199<br>0.0186<br>0.6189                                                   |
| S <sub>3</sub> | 299.9          | 4.134      | 0.1514              | H-3 → L<br>H-2 → L<br>H-1 → L<br>H → L+1                                                            | 0.0134<br>0.0132<br>0.6064<br>0.3251                                                   |
| S <sub>4</sub> | 289.8          | 4.278      | 0.0423              | H-3 → L<br>H-2 → L<br>H → L+2<br>H → L+3<br>H → L+6                                                 | 0.0729<br>0.4401<br>0.3613<br>0.0389<br>0.0253                                         |
| S <sub>5</sub> | 286.6          | 4.326      | 0.0333              | H-3 → L<br>H-2 → L<br>H-1 → L+2<br>H → L+2<br>H → L+3                                               | 0.1453<br>0.1895<br>0.0153<br>0.5661<br>0.0376                                         |
| S <sub>6</sub> | 278.7          | 4.449      | 0.1025              | H-3 → L<br>H-2 → L<br>H-2 → L+3<br>H-1 → L<br>H-1 → L+3<br>H → L+2<br>H → L+3<br>H → L+4<br>H → L+6 | 0.5143<br>0.1905<br>0.0155<br>0.0302<br>0.0179<br>0.0242<br>0.0744<br>0.0642<br>0.0380 |
| S <sub>7</sub> | 269.9          | 4.593      | 0.1060              | H-3 → L<br>H-2 → L<br>H-1 → L+4<br>H → L+4<br>H → L+5                                               | 0.0174<br>0.0490<br>0.0194<br>0.8372<br>0.0108                                         |
| S <sub>8</sub> | 264            | 4.696      | 0.0020              | H-3 → L<br>H-2 → L<br>H-1 → L+1<br>H → L+3<br>H → L+5<br>H → L+6                                    | 0.1181<br>0.0178<br>0.0119<br>0.7404<br>0.0488<br>0.0223                               |
| S <sub>9</sub> | 260.9          | 4.752      | 0.0012              | H-1 → L+5<br>H → L+3<br>H → L+5                                                                     | 0.0358<br>0.0481<br>0.8518                                                             |

|                 |       |       |        |                                                                                                                                                                                                             |                                                                                                                                                                        |
|-----------------|-------|-------|--------|-------------------------------------------------------------------------------------------------------------------------------------------------------------------------------------------------------------|------------------------------------------------------------------------------------------------------------------------------------------------------------------------|
| S <sub>10</sub> | 253   | 4.900 | 0.1188 | H-4 → L+2<br>H-2 → L+1<br>H-1 → L+1<br>H → L+1<br>H → L+3<br>H → L+4                                                                                                                                        | 0.0105<br>0.0841<br>0.8296<br>0.0182<br>0.0124<br>0.0111                                                                                                               |
| T <sub>1</sub>  | 451.5 | 2.746 | -      | H-1 → L<br>H → L<br>H → L+7                                                                                                                                                                                 | 0.0982<br>0.8505<br>0.0111                                                                                                                                             |
| T <sub>2</sub>  | 368.8 | 3.361 | -      | H-8 → L+7<br>H-3 → L<br>H-3 → L+3<br>H-2 → L<br>H-2 → L+6<br>H-1 → L<br>H → L<br>H → L+6<br>H → L+7                                                                                                         | 0.0170<br>0.0827<br>0.0136<br>0.4944<br>0.0126<br>0.2325<br>0.0562<br>0.0119<br>0.0152                                                                                 |
| T <sub>3</sub>  | 339.1 | 3.656 | -      | H-6 → L+5<br>H-5 → L+2<br>H-5 → L+5<br>H-4 → L+4<br>H-2 → L+1<br>H-1 → L+1<br>H-1 → L+2<br>H-1 → L+4<br>H → L+1<br>H → L+2<br>H → L+4                                                                       | 0.0125<br>0.0479<br>0.0102<br>0.0364<br>0.0197<br>0.1910<br>0.0118<br>0.0118<br>0.5257<br>0.0288<br>0.0161                                                             |
| T <sub>4</sub>  | 334.1 | 3.711 | -      | H-10 → L+3<br>H-8 → L<br>H-3 → L<br>H-3 → L+3<br>H-3 → L+7<br>H-2 → L<br>H-2 → L+6<br>H → L+2<br>H → L+6                                                                                                    | 0.0133<br>0.0176<br>0.5935<br>0.0663<br>0.0309<br>0.1244<br>0.0190<br>0.0110<br>0.0425                                                                                 |
| T <sub>5</sub>  | 324.3 | 3.823 | -      | H-6 → L+2<br>H-6 → L+4<br>H-5 → L+1<br>H-5 → L+5<br>H-4 → L+1<br>H-4 → L+5<br>H-3 → L<br>H-2 → L<br>H-2 → L+6<br>H-1 → L<br>H-1 → L+2<br>H-1 → L+3<br>H-1 → L+4<br>H → L+1<br>H → L+2<br>H → L+4<br>H → L+6 | 0.0245<br>0.0163<br>0.0534<br>0.0182<br>0.0496<br>0.0117<br>0.0529<br>0.0103<br>0.0222<br>0.0311<br>0.0863<br>0.0104<br>0.0153<br>0.0432<br>0.3006<br>0.0850<br>0.0558 |
| T <sub>6</sub>  | 317.7 | 3.902 | -      | H-8 → L<br>H-6 → L+2<br>H-6 → L+4<br>H-5 → L+1                                                                                                                                                              | 0.0133<br>0.0189<br>0.0131<br>0.0340                                                                                                                                   |

|                 |       |       |   |                                                                                                                                                                                                        |                                                                                                                                                              |
|-----------------|-------|-------|---|--------------------------------------------------------------------------------------------------------------------------------------------------------------------------------------------------------|--------------------------------------------------------------------------------------------------------------------------------------------------------------|
|                 |       |       |   | H-5 → L+5<br>H-4 → L+1<br>H-3 → L<br>H-2 → L+2<br>H-2 → L+4<br>H-2 → L+6<br>H-1 → L<br>H-1 → L+2<br>H-1 → L+4<br>H → L+2<br>H → L+3<br>H → L+6<br>H → L+7                                              | 0.0114<br>0.0365<br>0.0680<br>0.0209<br>0.0144<br>0.0518<br>0.0956<br>0.0541<br>0.0204<br>0.0150<br>0.1014<br>0.2872<br>0.0111                               |
| T <sub>7</sub>  | 310.6 | 3.992 | - | H-7 → L<br>H-3 → L<br>H-3 → L+3<br>H-2 → L<br>H-1 → L<br>H-1 → L+7<br>H → L<br>H → L+3<br>H → L+6<br>H → L+7                                                                                           | 0.0246<br>0.0175<br>0.0110<br>0.2540<br>0.4728<br>0.0109<br>0.0534<br>0.0143<br>0.0451<br>0.0136                                                             |
| T <sub>8</sub>  | 298.4 | 4.155 | - | H-10 → L<br>H-10 → L+3<br>H-8 → L<br>H-8 → L+3<br>H-3 → L<br>H-3 → L+3<br>H-3 → L+6<br>H-2 → L<br>H-2 → L+3<br>H-2 → L+7<br>H-1 → L+3<br>H-1 → L+7<br>H → L+2<br>H → L+3<br>H → L+6<br>H → L+7         | 0.0165<br>0.0158<br>0.0434<br>0.0234<br>0.0570<br>0.2745<br>0.0148<br>0.0117<br>0.0916<br>0.0326<br>0.0463<br>0.0305<br>0.0191<br>0.0730<br>0.1072<br>0.0309 |
| T <sub>9</sub>  | 294.4 | 4.212 | - | H-9 → L+1<br>H-7 → L+1<br>H-6 → L+2<br>H-6 → L+4<br>H-6 → L+5<br>H-5 → L+1<br>H-5 → L+2<br>H-5 → L+5<br>H-4 → L+1<br>H-4 → L+4<br>H-2 → L+1<br>H-2 → L+3<br>H-1 → L+1<br>H → L+1<br>H → L+2<br>H → L+6 | 0.0236<br>0.0345<br>0.0488<br>0.0196<br>0.0956<br>0.0126<br>0.1085<br>0.0141<br>0.0554<br>0.0868<br>0.0168<br>0.0160<br>0.0259<br>0.2259<br>0.0688<br>0.0270 |
| T <sub>10</sub> | 291.5 | 4.253 | - | H-8 → L<br>H-7 → L+4<br>H-6 → L+5<br>H-5 → L+2                                                                                                                                                         | 0.0239<br>0.0156<br>0.0242<br>0.0182                                                                                                                         |



|  |  |  |  |           |        |
|--|--|--|--|-----------|--------|
|  |  |  |  | H-4 → L+1 | 0.0321 |
|  |  |  |  | H-4 → L+4 | 0.0466 |
|  |  |  |  | H-4 → L+5 | 0.0359 |
|  |  |  |  | H-2 → L+3 | 0.0178 |
|  |  |  |  | H-1 → L+2 | 0.0117 |
|  |  |  |  | H-1 → L+4 | 0.0832 |
|  |  |  |  | H → L+1   | 0.0339 |
|  |  |  |  | H → L+2   | 0.2320 |
|  |  |  |  | H → L+3   | 0.0686 |
|  |  |  |  | H → L+4   | 0.1916 |
|  |  |  |  | H → L+5   | 0.0119 |

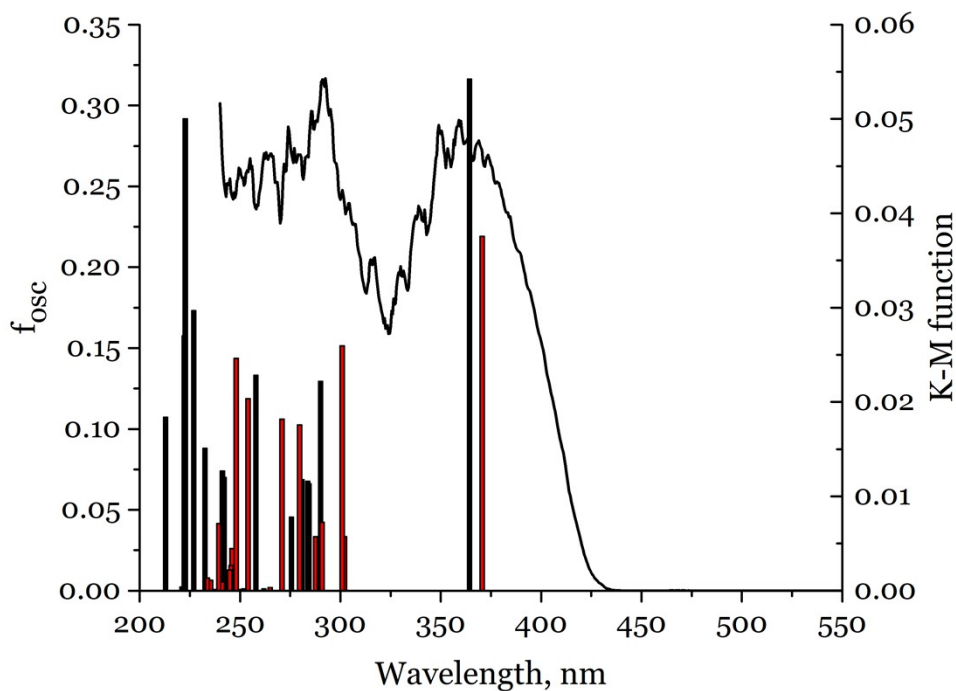

Figure S8 –Overlaid solid-state UV-Vis spectrum and calculated TD-DFT transitions for **1**, red bars – TD-PBE0, black bars – TD-B2PLYP levels

Table S6 – Main excitation transitions of **2** in the ground state (TD-B2PLYP for singlets and TDA-B2PLYP for triplets). H – HOMO, L – LUMO.

| State          | Wavelength, nm | Energy, eV | Oscillator strength | Transition | Contribution |
|----------------|----------------|------------|---------------------|------------|--------------|
| S <sub>1</sub> | 350.8          | 3.534      | 0.5581              | H-1 → L    | 0.1162       |
|                |                |            |                     | H-1 → L+1  | 0.1937       |
|                |                |            |                     | H → L      | 0.5680       |
|                |                |            |                     | H → L+1    | 0.0494       |
| S <sub>2</sub> | 345.8          | 3.586      | 0.1478              | H-1 → L    | 0.1845       |
|                |                |            |                     | H-1 → L+1  | 0.1868       |
|                |                |            |                     | H → L      | 0.0717       |
|                |                |            |                     | H → L+1    | 0.4893       |
| S <sub>3</sub> | 295.4          | 4.197      | 0.0237              | H-5 → L    | 0.0128       |
|                |                |            |                     | H-4 → L+1  | 0.1182       |
|                |                |            |                     | H-3 → L    | 0.3343       |
|                |                |            |                     | H-2 → L    | 0.0808       |
|                |                |            |                     | H-2 → L+1  | 0.1682       |
|                |                |            |                     | H-1 → L    | 0.0639       |
|                |                |            |                     | H-1 → L+2  | 0.0216       |
|                |                |            |                     | H-1 → L+6  | 0.0142       |
|                |                |            |                     | H → L+1    | 0.0289       |
|                |                |            |                     | H → L+7    | 0.0112       |

|                |       |       |        |                                                                                                                                                                                          |                                                                                                                                                              |
|----------------|-------|-------|--------|------------------------------------------------------------------------------------------------------------------------------------------------------------------------------------------|--------------------------------------------------------------------------------------------------------------------------------------------------------------|
| S <sub>4</sub> | 293.5 | 4.224 | 0.1877 | H-5 → L<br>H-4 → L<br>H-4 → L+1<br>H-3 → L<br>H-3 → L+1<br>H-2 → L<br>H-2 → L+1<br>H-1 → L+1<br>H-1 → L+7<br>H → L+1<br>H → L+2<br>H → L+6                                               | 0.0208<br>0.0396<br>0.1202<br>0.1354<br>0.1397<br>0.1473<br>0.0924<br>0.0552<br>0.0125<br>0.0294<br>0.0477<br>0.0231                                         |
| S <sub>5</sub> | 299.9 | 4.135 | 0.0354 | H-6 → L<br>H-6 → L+1<br>H-6 → L+8<br>H-5 → L<br>H-4 → L+3<br>H-3 → L+1<br>H-2 → L+1<br>H-2 → L+3<br>H-1 → L<br>H-1 → L+1<br>H-1 → L+3<br>H → L<br>H → L+1<br>H → L+2<br>H → L+3          | 0.0144<br>0.2150<br>0.0154<br>0.0262<br>0.0120<br>0.0321<br>0.0153<br>0.0150<br>0.0261<br>0.2725<br>0.0302<br>0.0794<br>0.1301<br>0.0256<br>0.0149           |
| S <sub>6</sub> | 292.5 | 4.238 | 0.0521 | H-6 → L<br>H-6 → L+1<br>H-5 → L<br>H-5 → L+1<br>H-5 → L+9<br>H-4 → L<br>H-3 → L+4<br>H-2 → L<br>H-2 → L+4<br>H-1 → L<br>H-1 → L+3<br>H-1 → L+4<br>H → L<br>H → L+1<br>H → L+4            | 0.0109<br>0.0863<br>0.2954<br>0.0311<br>0.0166<br>0.0102<br>0.0181<br>0.0261<br>0.0162<br>0.1972<br>0.0121<br>0.0287<br>0.0663<br>0.0334<br>0.0340           |
| S <sub>7</sub> | 292.6 | 4.237 | 0.0040 | H-6 → L+1<br>H-5 → L<br>H-5 → L+1<br>H-5 → L+9<br>H-4 → L<br>H-3 → L<br>H-3 → L+4<br>H-1 → L<br>H-1 → L+1<br>H-1 → L+4<br>H-1 → L+7<br>H → L<br>H → L+2<br>H → L+4<br>H → L+6<br>H → L+7 | 0.0491<br>0.2747<br>0.0145<br>0.0136<br>0.0100<br>0.0641<br>0.0192<br>0.1816<br>0.0213<br>0.0139<br>0.0102<br>0.1118<br>0.0363<br>0.0126<br>0.0149<br>0.0273 |
| S <sub>8</sub> | 293.3 | 4.227 | 0.0125 | H-6 → L                                                                                                                                                                                  | 0.0182                                                                                                                                                       |

|                 |       |       |        |                                                                                                                                                                                       |                                                                                                                                                    |
|-----------------|-------|-------|--------|---------------------------------------------------------------------------------------------------------------------------------------------------------------------------------------|----------------------------------------------------------------------------------------------------------------------------------------------------|
|                 |       |       |        | H-6 → L+1<br>H-6 → L+8<br>H-4 → L+1<br>H-4 → L+3<br>H-3 → L<br>H-3 → L+1<br>H-2 → L+1<br>H-2 → L+3<br>H-1 → L<br>H-1 → L+1<br>H-1 → L+3<br>H-1 → L+6<br>H → L+1<br>H → L+3<br>H → L+6 | 0.2395<br>0.0133<br>0.0181<br>0.0145<br>0.0135<br>0.0591<br>0.0258<br>0.0106<br>0.0937<br>0.1466<br>0.0215<br>0.0165<br>0.1940<br>0.0134<br>0.0180 |
| S <sub>9</sub>  | 275.1 | 4.507 | 0.1048 | H-3 → L<br>H-3 → L+1<br>H-2 → L<br>H-2 → L+1<br>H-2 → L+2<br>H-2 → L+3<br>H-1 → L<br>H-1 → L+1<br>H-1 → L+7<br>H → L<br>H → L+2<br>H → L+6<br>H → L+7                                 | 0.0109<br>0.0341<br>0.0401<br>0.0719<br>0.0852<br>0.0121<br>0.0300<br>0.0222<br>0.0186<br>0.0446<br>0.4422<br>0.0281<br>0.0141                     |
| S <sub>10</sub> | 280.4 | 4.421 | 0.0139 | H-12 → L+1<br>H-11 → L+1<br>H-10 → L+1<br>H-9 → L+1<br>H-6 → L+1<br>H-4 → L<br>H-4 → L+1<br>H-2 → L+1<br>H-2 → L+2<br>H → L+2                                                         | 0.0796<br>0.0129<br>0.0166<br>0.0606<br>0.0169<br>0.0144<br>0.2884<br>0.3034<br>0.0175<br>0.0465                                                   |
| T <sub>1</sub>  | 415.8 | 2.982 | -      | H-8 → L+9<br>H-5 → L<br>H-5 → L+4<br>H-3 → L<br>H-2 → L<br>H-1 → L<br>H-1 → L+1<br>H → L<br>H → L+1<br>H → L+7                                                                        | 0.0184<br>0.0217<br>0.0164<br>0.0273<br>0.0521<br>0.2861<br>0.0250<br>0.3779<br>0.0316<br>0.0104                                                   |
| T <sub>2</sub>  | 408.6 | 3.034 | -      | H-10 → L+8<br>H-6 → L+1<br>H-6 → L+3<br>H-4 → L+1<br>H-3 → L+1<br>H-2 → L+1<br>H-1 → L<br>H-1 → L+1<br>H → L<br>H → L+1                                                               | 0.0125<br>0.0213<br>0.0165<br>0.0264<br>0.0124<br>0.0728<br>0.0347<br>0.3696<br>0.0226<br>0.2588                                                   |
| T <sub>3</sub>  | 342.9 | 3.616 | -      | H-6 → L+1                                                                                                                                                                             | 0.0411                                                                                                                                             |

|                |       |       |   |                                                                                                                                                                                                                                                                              |                                                                                                                                                                                                                |
|----------------|-------|-------|---|------------------------------------------------------------------------------------------------------------------------------------------------------------------------------------------------------------------------------------------------------------------------------|----------------------------------------------------------------------------------------------------------------------------------------------------------------------------------------------------------------|
|                |       |       |   | H-6 → L+3<br>H-4 → L<br>H-4 → L+1<br>H-4 → L+6<br>H-3 → L+1<br>H-2 → L+1<br>H-1 → L+1<br>H-1 → L+8<br>H → L+1<br>H → L+6<br>H → L+8                                                                                                                                          | 0.0297<br>0.0151<br>0.2366<br>0.0108<br>0.0974<br>0.1039<br>0.0342<br>0.0273<br>0.1574<br>0.0115<br>0.0253                                                                                                     |
| T <sub>4</sub> | 340   | 3.646 | - | H-8 → L+9<br>H-5 → L<br>H-5 → L+4<br>H-4 → L<br>H-3 → L<br>H-3 → L+1<br>H-3 → L+4<br>H-2 → L<br>H-1 → L<br>H-1 → L+9<br>H → L<br>H → L+9                                                                                                                                     | 0.0128<br>0.0570<br>0.0490<br>0.0424<br>0.3422<br>0.0296<br>0.0108<br>0.0951<br>0.0199<br>0.0278<br>0.1225<br>0.0387                                                                                           |
| T <sub>5</sub> | 331.1 | 3.745 | - | H-10 → L+2<br>H-9 → L+2<br>H-9 → L+3<br>H-9 → L+6<br>H-7 → L+5<br>H-6 → L+1<br>H-6 → L+3<br>H-4 → L+2<br>H-4 → L+3<br>H-4 → L+6<br>H-3 → L+2<br>H-2 → L+2<br>H-2 → L+3<br>H-2 → L+6<br>H → L+2                                                                               | 0.0131<br>0.0407<br>0.0114<br>0.0131<br>0.2247<br>0.0112<br>0.0162<br>0.0924<br>0.0205<br>0.0448<br>0.0122<br>0.2102<br>0.0354<br>0.0163<br>0.0527                                                             |
| T <sub>6</sub> | 327.7 | 3.784 | - | H-14 → L+3<br>H-10 → L+1<br>H-9 → L+1<br>H-8 → L+1<br>H-7 → L+5<br>H-6 → L<br>H-6 → L+1<br>H-6 → L+2<br>H-6 → L+3<br>H-6 → L+8<br>H-4 → L+2<br>H-4 → L+6<br>H-4 → L+8<br>H-4 → L+11<br>H-3 → L+6<br>H-2 → L+6<br>H-2 → L+8<br>H-1 → L+2<br>H-1 → L+6<br>H-1 → L+8<br>H → L+2 | 0.0162<br>0.0443<br>0.0271<br>0.0244<br>0.0292<br>0.0132<br>0.1078<br>0.0210<br>0.1131<br>0.0196<br>0.0539<br>0.0301<br>0.0104<br>0.0134<br>0.0225<br>0.0241<br>0.0160<br>0.0146<br>0.0257<br>0.0461<br>0.0152 |

|                |       |       |   |                                                                                                                                                                                                                                                                               |                                                                                                                                                                                                                          |
|----------------|-------|-------|---|-------------------------------------------------------------------------------------------------------------------------------------------------------------------------------------------------------------------------------------------------------------------------------|--------------------------------------------------------------------------------------------------------------------------------------------------------------------------------------------------------------------------|
|                |       |       |   | H → L+6<br>H → L+8<br>H → L+11                                                                                                                                                                                                                                                | 0.0482<br>0.0238<br>0.0113                                                                                                                                                                                               |
| T <sub>7</sub> | 325.6 | 3.808 | - | H-13 → L+4<br>H-10 → L<br>H-8 → L<br>H-5 → L<br>H-5 → L+1<br>H-5 → L+4<br>H-5 → L+9<br>H-3 → L<br>H-3 → L+2<br>H-3 → L+7<br>H-3 → L+9<br>H-2 → L<br>H-2 → L+9<br>H-1 → L+2<br>H-1 → L+7<br>H-1 → L+9<br>H → L+4<br>H → L+7<br>H → L+9                                         | 0.0208<br>0.0318<br>0.0725<br>0.1189<br>0.0112<br>0.1475<br>0.0201<br>0.0505<br>0.0141<br>0.0612<br>0.0402<br>0.0123<br>0.0207<br>0.0108<br>0.0309<br>0.0127<br>0.0115<br>0.0597<br>0.0102                               |
| T <sub>8</sub> | 299.5 | 4.140 | - | H-6 → L<br>H-6 → L+1<br>H-6 → L+3<br>H-6 → L+8<br>H-5 → L<br>H-4 → L<br>H-4 → L+1<br>H-4 → L+2<br>H-4 → L+6<br>H-3 → L+1<br>H-3 → L+7<br>H-2 → L<br>H-2 → L+1<br>H-1 → L+1<br>H-1 → L+2<br>H-1 → L+6<br>H-1 → L+7<br>H-1 → L+8<br>H-1 → L+11<br>H → L+2<br>H → L+6<br>H → L+8 | 0.0151<br>0.1551<br>0.0657<br>0.0255<br>0.0385<br>0.0112<br>0.0730<br>0.0119<br>0.0214<br>0.0557<br>0.0115<br>0.0201<br>0.0328<br>0.0162<br>0.0170<br>0.0362<br>0.0193<br>0.0113<br>0.0186<br>0.0725<br>0.0834<br>0.0130 |
| T <sub>9</sub> | 298.4 | 4.154 | - | H-6 → L+1<br>H-6 → L+3<br>H-5 → L<br>H-5 → L+1<br>H-5 → L+4<br>H-5 → L+9<br>H-4 → L+1<br>H-3 → L<br>H-3 → L+2<br>H-3 → L+6<br>H-3 → L+7<br>H-2 → L<br>H-2 → L+1<br>H-1 → L<br>H-1 → L+2                                                                                       | 0.0264<br>0.0106<br>0.1940<br>0.0227<br>0.0379<br>0.0205<br>0.0133<br>0.1015<br>0.0130<br>0.0139<br>0.0509<br>0.0223<br>0.0182<br>0.0115<br>0.0412                                                                       |

|          |       |       |   |           |        |
|----------|-------|-------|---|-----------|--------|
|          |       |       |   | H-1 → L+4 | 0.0165 |
|          |       |       |   | H-1 → L+6 | 0.0277 |
|          |       |       |   | H-1 → L+7 | 0.0386 |
|          |       |       |   | H → L+4   | 0.0275 |
|          |       |       |   | H → L+7   | 0.1072 |
|          |       |       |   | H → L+11  | 0.0171 |
| $T_{10}$ | 288.8 | 4.293 | - | H-13 → L  | 0.0256 |
|          |       |       |   | H-8 → L   | 0.0101 |
|          |       |       |   | H-8 → L+4 | 0.0218 |
|          |       |       |   | H-6 → L+1 | 0.0173 |
|          |       |       |   | H-5 → L   | 0.2295 |
|          |       |       |   | H-5 → L+1 | 0.0170 |
|          |       |       |   | H-5 → L+4 | 0.1627 |
|          |       |       |   | H-5 → L+7 | 0.0128 |
|          |       |       |   | H-3 → L+4 | 0.0731 |
|          |       |       |   | H-3 → L+9 | 0.0148 |
|          |       |       |   | H-2 → L+4 | 0.0266 |
|          |       |       |   | H-1 → L+4 | 0.0275 |
|          |       |       |   | H-1 → L+7 | 0.0265 |
|          |       |       |   | H-1 → L+9 | 0.0113 |
|          |       |       |   | H → L+4   | 0.0216 |
|          |       |       |   | H → L+6   | 0.0106 |
|          |       |       |   | H → L+7   | 0.0451 |

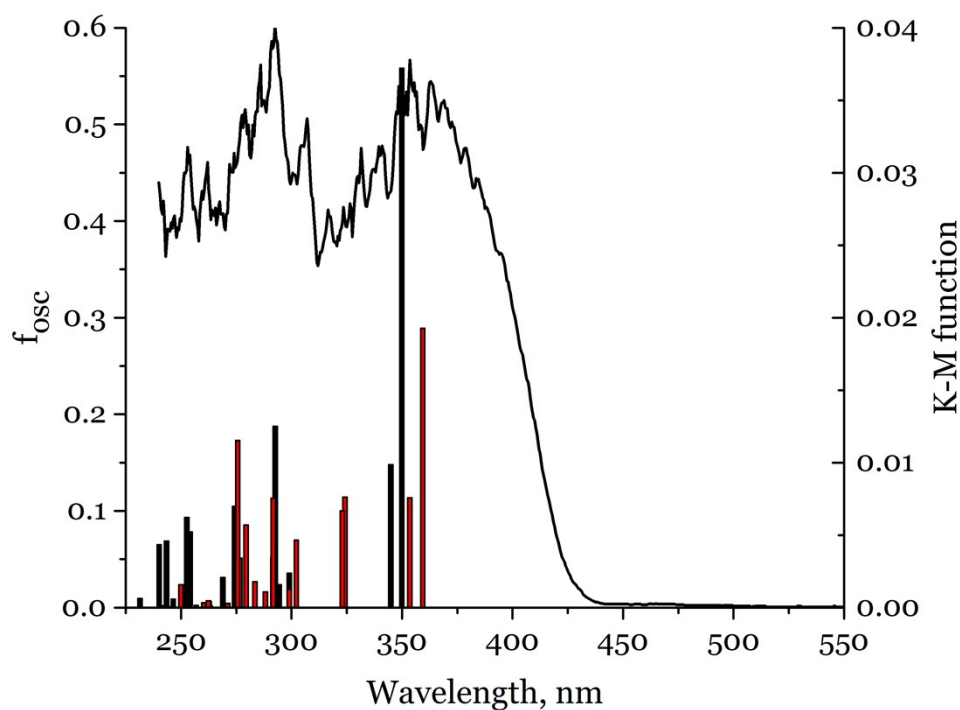

Figure S9 – Overlaid solid-state UV-Vis spectrum and calculated TD-DFT transitions for **2**, red bars – TD-PBE0, black bars – TD-B2PLYP levels.

Table S7 – Main excitation transitions of **3** in the ground state (TD-PBE0 for singlets and TDA-PBE0 for triplets). H – HOMO, L – LUMO.

| State | Wavelength, nm | Energy, eV | Oscillator strength | Transition         | Contribution     |
|-------|----------------|------------|---------------------|--------------------|------------------|
| $S_1$ | 362.1          | 3.424      | 0.1135              | H-2 → L<br>H-1 → L | 0.0960<br>0.2208 |

|                 |       |       |        |                                                                                      |                                                                              |
|-----------------|-------|-------|--------|--------------------------------------------------------------------------------------|------------------------------------------------------------------------------|
|                 |       |       |        | H → L<br>H → L+1                                                                     | 0.6086<br>0.0429                                                             |
| S <sub>2</sub>  | 353.5 | 3.507 | 0.1585 | H-1 → L<br>H-1 → L+1<br>H → L<br>H → L,1<br>H → L+2                                  | 0.0213<br>0.0304<br>0.0239<br>0.8476<br>0.0285                               |
| S <sub>3</sub>  | 343.5 | 3.609 | 0.0273 | H → L+1<br>H → L+2                                                                   | 0.0450<br>0.9173                                                             |
| S <sub>4</sub>  | 331.8 | 3.737 | 0.0295 | H-2 → L<br>H-1 → L<br>H → L                                                          | 0.0798<br>0.5457<br>0.3469                                                   |
| S <sub>5</sub>  | 325   | 3.815 | 0.0407 | H-4 → L<br>H-2 → L<br>H-2 → L+1<br>H-1 → L<br>H-1 → L+1                              | 0.0157<br>0.2879<br>0.2405<br>0.0502<br>0.3445                               |
| S <sub>6</sub>  | 322.8 | 3.841 | 0.0468 | H-4 → L<br>H-3 → L<br>H-2 → L<br>H-2 → L+1<br>H-2 → L+2<br>H-1 → L<br>H-1 → L+1      | 0.0350<br>0.0113<br>0.4602<br>0.1198<br>0.0112<br>0.0970<br>0.2293           |
| S <sub>7</sub>  | 315.3 | 3.933 | 0.0685 | H-2 → L+1<br>H-2 → L+2<br>H-1 → L+1<br>H-1 → L+2<br>H → L+1                          | 0.2534<br>0.0101<br>0.1868<br>0.5053<br>0.0132                               |
| S <sub>8</sub>  | 313.5 | 3.955 | 0.1290 | H-3 → L+1<br>H-3 → L+2<br>H-2 → L+1<br>H-2 → L+2<br>H-1 → L+1<br>H-1 → L+2           | 0.1329<br>0.0242<br>0.1780<br>0.4044<br>0.0667<br>0.1523                     |
| S <sub>9</sub>  | 306.2 | 4.049 | 0.0219 | H-3 → L<br>H-3 → L+1<br>H-3 → L+2<br>H-2 → L+2                                       | 0.0151<br>0.7079<br>0.0260<br>0.1885                                         |
| S <sub>10</sub> | 302.9 | 4.093 | 0.0030 | H-9 → L<br>H-7 → L<br>H-6 → L<br>H-5 → L<br>H-4 → L<br>H-3 → L<br>H-2 → L<br>H-1 → L | 0.0119<br>0.0135<br>0.0422<br>0.0231<br>0.5415<br>0.2405<br>0.0469<br>0.0360 |
| T <sub>1</sub>  | 433.2 | 2.862 | -      | H-5 → L+1<br>H-2 → L+1<br>H-1 → L+1<br>H-1 → L+2<br>H → L+1<br>H → L+2               | 0.0154<br>0.0148<br>0.0785<br>0.0596<br>0.5032<br>0.2326                     |
| T <sub>2</sub>  | 430.1 | 2.882 | -      | H-7 → L<br>H-2 → L<br>H-1 → L<br>H → L                                               | 0.0506<br>0.2705<br>0.3381<br>0.2558                                         |
| T <sub>3</sub>  | 418   | 2.966 | -      | H-6 → L+1<br>H-6 → L+2                                                               | 0.0113<br>0.0134                                                             |

|                |       |       |   |                                                                                                                                                                      |                                                                                                                                |
|----------------|-------|-------|---|----------------------------------------------------------------------------------------------------------------------------------------------------------------------|--------------------------------------------------------------------------------------------------------------------------------|
|                |       |       |   | H-3 → L+1<br>H-3 → L+2<br>H-2 → L+1<br>H-2 → L+2<br>H-1 → L+1<br>H-1 → L+2<br>H → L+1<br>H → L+2                                                                     | 0.0281<br>0.0248<br>0.1853<br>0.2336<br>0.1515<br>0.1396<br>0.0258<br>0.0718                                                   |
| T <sub>4</sub> | 367.6 | 3.372 | - | H-9 → L<br>H-8 → L+4<br>H-7 → L<br>H-4 → L<br>H-2 → L<br>H-1 → L<br>H → L                                                                                            | 0.1024<br>0.0125<br>0.5089<br>0.0356<br>0.0133<br>0.0457<br>0.0833                                                             |
| T <sub>5</sub> | 366.5 | 3.383 | - | H-6 → L+1<br>H-6 → L+2<br>H-5 → L+1<br>H-5 → L+2<br>H-4 → L+1<br>H-4 → L+2<br>H-3 → L+1<br>H-1 → L+2<br>H → L+1<br>H → L+13                                          | 0.0122<br>0.0132<br>0.2846<br>0.1308<br>0.1607<br>0.0491<br>0.0317<br>0.0138<br>0.0982<br>0.0182                               |
| T <sub>6</sub> | 355.5 | 3.488 | - | H-5 → L+1<br>H-4 → L+2<br>H-3 → L+1<br>H-3 → L+2<br>H-2 → L+1<br>H-2 → L+2<br>H → L+2                                                                                | 0.0438<br>0.0286<br>0.3225<br>0.3577<br>0.0342<br>0.0345<br>0.0225                                                             |
| T <sub>7</sub> | 348.3 | 3.559 | - | H-5 → L+2<br>H-4 → L+2<br>H-3 → L+1<br>H-3 → L+2<br>H-1 → L+1<br>H-1 → L+2<br>H → L+1<br>H → L+2<br>H → L+3                                                          | 0.0147<br>0.0187<br>0.0455<br>0.0208<br>0.0192<br>0.0310<br>0.2144<br>0.5165<br>0.0103                                         |
| T <sub>8</sub> | 342.9 | 3.616 | - | H-6 → L+1<br>H-6 → L+2<br>H-6 → L+15<br>H-5 → L+1<br>H-5 → L+2<br>H-4 → L+1<br>H-4 → L+2<br>H-3 → L+1<br>H-2 → L+1<br>H-2 → L+2<br>H-1 → L+1<br>H-1 → L+2<br>H → L+2 | 0.2373<br>0.1258<br>0.0102<br>0.0699<br>0.0230<br>0.0669<br>0.0319<br>0.0189<br>0.0870<br>0.0531<br>0.0599<br>0.0445<br>0.0101 |
| T <sub>9</sub> | 337.2 | 3.677 | - | H-19 → L<br>H-9 → L<br>H-9 → L+4<br>H-8 → L<br>H-2 → L                                                                                                               | 0.0168<br>0.0382<br>0.0115<br>0.1841<br>0.0545                                                                                 |



|          |       |       |   |           |        |
|----------|-------|-------|---|-----------|--------|
|          |       |       |   | H-2 → L+4 | 0.0142 |
|          |       |       |   | H-2 → L+6 | 0.0150 |
|          |       |       |   | H-1 → L   | 0.0424 |
|          |       |       |   | H-1 → L+1 | 0.0332 |
|          |       |       |   | H-1 → L+4 | 0.0374 |
|          |       |       |   | H-1 → L+6 | 0.0206 |
|          |       |       |   | H → L     | 0.2189 |
|          |       |       |   | H → L+3   | 0.0341 |
|          |       |       |   | H → L+4   | 0.0183 |
|          |       |       |   | H → L+6   | 0.0220 |
| $T_{10}$ | 335.2 | 3.698 | - | H-10 → L  | 0.0160 |
|          |       |       |   | H-9 → L   | 0.0470 |
|          |       |       |   | H-8 → L   | 0.0771 |
|          |       |       |   | H-4 → L   | 0.0108 |
|          |       |       |   | H-1 → L   | 0.2438 |
|          |       |       |   | H-1 → L+4 | 0.0140 |
|          |       |       |   | H-1 → L+6 | 0.0112 |
|          |       |       |   | H → L     | 0.3946 |

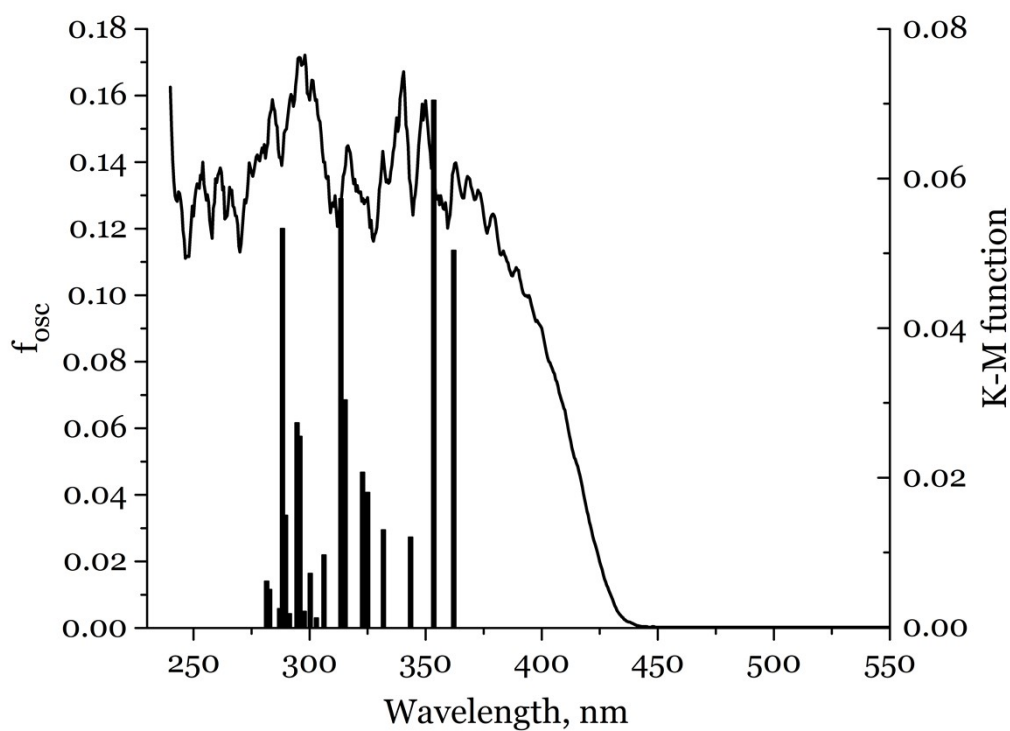

Figure S10 – Overlaid solid-state UV-Vis spectrum and calculated TD-DFT transitions for **3** (TD-PBE0 level).

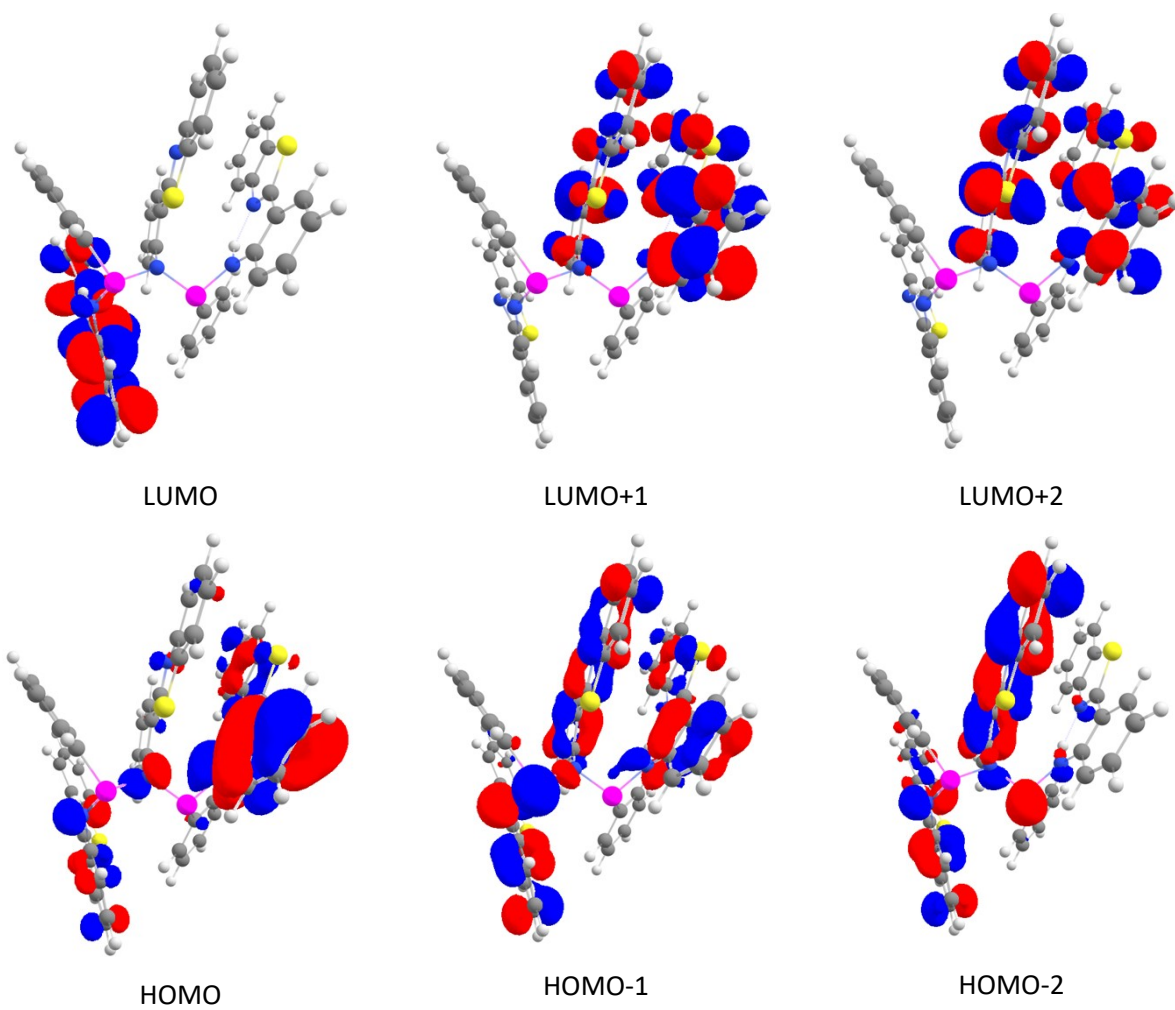

Figure S11 – Frontier orbitals of **3** (PBE0/def2-TZVP(-f), isovalue = 0.03)

## Experimental photophysical properties

Table S8. CIE x,y chromacity coordinates of compounds **1–3** depending on the excitation wavelength  $\lambda_{\text{Ex}}$ , nm.

| $\lambda_{\text{Ex}}$ | <b>1</b> |      | $\lambda_{\text{Ex}}$ | <b>2</b> |      | $\lambda_{\text{Ex}}$ | <b>3</b> |      |
|-----------------------|----------|------|-----------------------|----------|------|-----------------------|----------|------|
|                       | x        | y    |                       | x        | y    |                       | x        | y    |
| 300                   | 0.34     | 0.43 | 300                   | 0.18     | 0.19 | 340                   | 0.37     | 0.46 |
| 340                   | 0.39     | 0.49 | 375                   | 0.2      | 0.17 | 375                   | 0.31     | 0.37 |
| 380                   | 0.29     | 0.32 | 400                   | 0.19     | 0.16 | 400                   | 0.21     | 0.23 |
| 400                   | 0.23     | 0.22 | 420                   | 0.21     | 0.21 | 420                   | 0.20     | 0.25 |
| 420                   | 0.24     | 0.27 |                       |          |      |                       |          |      |

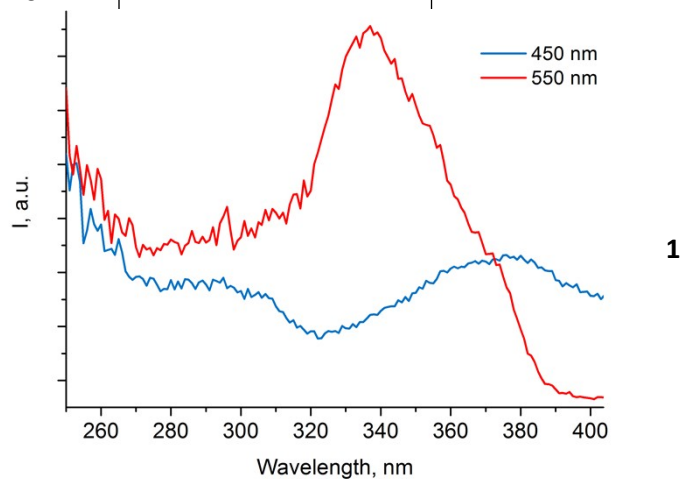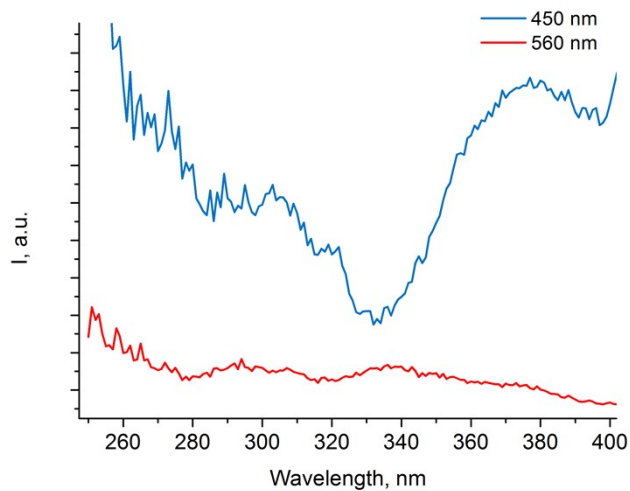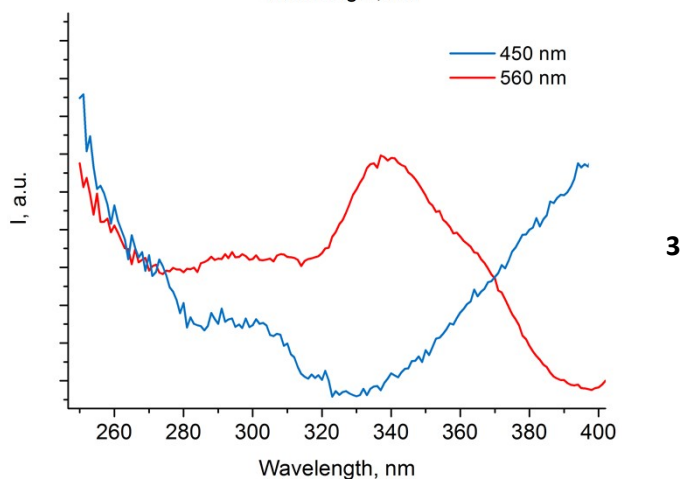

Figure S12. Excitation spectra of solid compounds **1–3** for the emission at 450 and 550 nm

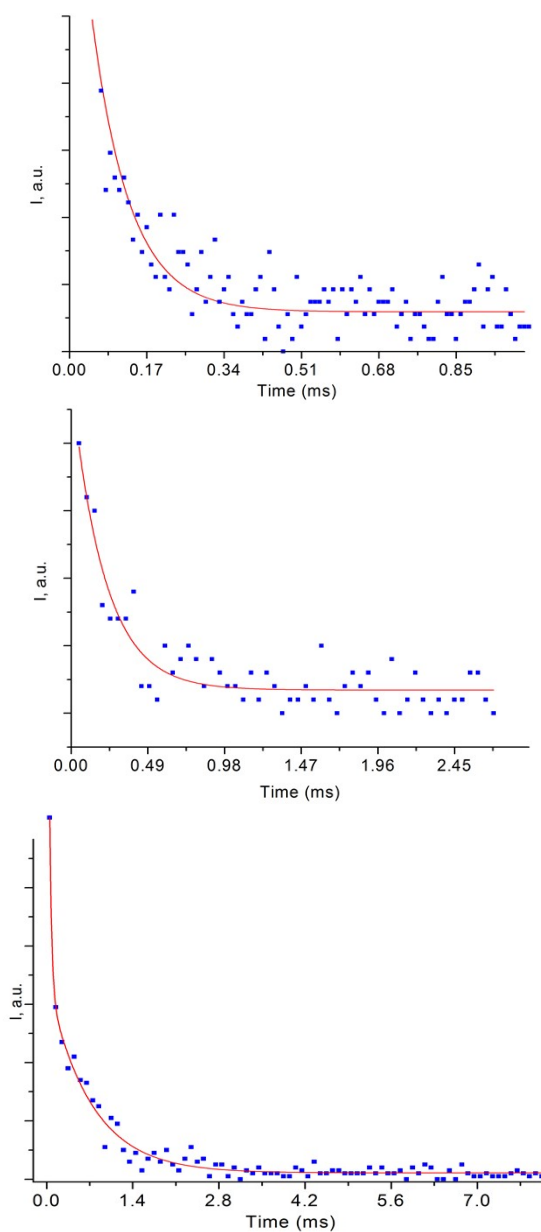

Figure S13. Decay kinetics data for solid compounds **1–3** at  $\lambda_{Em}$  of 550 nm. Blue dots – experiment, red line – fitting.

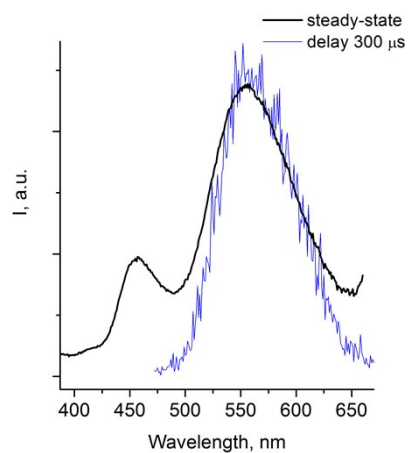

Figure S14. Steady-state (black line) and delayed (300  $\mu$ s delay, blue line) emission spectra for solid compound **3**.

## DFT calculation of relaxation processes

Table S9 - Selected geometry parameters for optimized excited states of **1**. LE – locally excited state, TICT – “twisted” intramolecular charge transfer state.

|                                     | 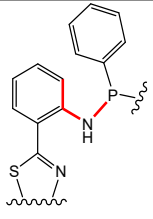 |  |  |  |  |
|-------------------------------------|-----------------------------------------------------------------------------------|-----------------------------------------------------------------------------------|-----------------------------------------------------------------------------------|-------------------------------------------------------------------------------------|-------------------------------------------------------------------------------------|
|                                     | CCNP, deg                                                                         | NCCC, deg                                                                         | CNPC, deg                                                                         | CNP, deg                                                                            | NPC, deg                                                                            |
| <sup>1</sup> LE                     | 2.53                                                                              | 10.61                                                                             | 76.62, 179.12                                                                     | 129.16                                                                              | 97.08, 102.76                                                                       |
| <sup>1</sup> TICT                   | 66.60                                                                             | 8.98                                                                              | 88.78, 149.32                                                                     | 117.19                                                                              | 109.62, 111.85                                                                      |
| <sup>3</sup> LE (T <sub>1</sub> )   | 11.74                                                                             | 1.35                                                                              | 86.02, 170.25                                                                     | 127.59                                                                              | 95.29, 102.70                                                                       |
| <sup>3</sup> TICT (T <sub>1</sub> ) | 56.86                                                                             | 3.66                                                                              | 42.80, 157.19                                                                     | 121.60                                                                              | 102.14, 111.11                                                                      |
| <sup>3</sup> LE (T <sub>2</sub> )   | 2.93                                                                              | 0.78                                                                              | 92.77, 164.53                                                                     | 128.33                                                                              | 96.35, 102.06                                                                       |
| <sup>3</sup> TICT (T <sub>2</sub> ) | 50.85                                                                             | 6.54                                                                              | 62.50, 169.74                                                                     | 120.00                                                                              | 98.68, 107.24                                                                       |

Table S10 - Selected geometry parameters for optimized excited states of **2**. LE – locally excited state, TICT – “twisted” intramolecular charge transfer state.

|                                     | 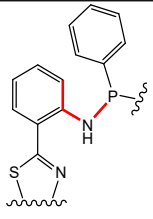 |  |  |  |  |
|-------------------------------------|-------------------------------------------------------------------------------------|-------------------------------------------------------------------------------------|-------------------------------------------------------------------------------------|---------------------------------------------------------------------------------------|---------------------------------------------------------------------------------------|
|                                     | CCNP, deg                                                                           | NCCC, deg                                                                           | CNPC, deg                                                                           | CNP, deg                                                                              | NPC, deg                                                                              |
| <sup>1</sup> LE                     | 1.13, 21.75                                                                         | 0.65, 1.01                                                                          | 72.93, 163.97                                                                       | 126.04,<br>132.36                                                                     | 98.50, 101.83                                                                         |
| <sup>1</sup> TICT                   | 46.22, 57.09                                                                        | 2.14, 6.81                                                                          | 102.17, 160.76                                                                      | 119.75,<br>120.12                                                                     | 104.85, 110.36                                                                        |
| <sup>3</sup> LE (T <sub>1</sub> )   | 27.76, 28.74                                                                        | 0.81, 18.86                                                                         | 68.95, 178.32                                                                       | 125.99,<br>130.00                                                                     | 95.93, 106.16                                                                         |
| <sup>3</sup> TICT (T <sub>1</sub> ) | 35.26, 56.86                                                                        | 5.79, 10.89                                                                         | 79.17, 163.19                                                                       | 120.16,<br>123.68                                                                     | 96.55, 103.53                                                                         |

Table S11 - Selected geometry parameters for optimized excited states of **3**. LE – locally excited state, TICT – “twisted” intramolecular charge transfer state.

|                 | 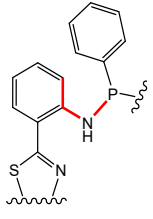 |  |  |  |  |
|-----------------|-------------------------------------------------------------------------------------|-------------------------------------------------------------------------------------|-------------------------------------------------------------------------------------|---------------------------------------------------------------------------------------|---------------------------------------------------------------------------------------|
|                 | CCNP, deg                                                                           | NCCC, deg                                                                           | CNPC, deg                                                                           | CNP, deg                                                                              | NPC, deg                                                                              |
| <sup>1</sup> LE | 0.65,                                                                               | 4.58,                                                                               | 39.77, 49.68,                                                                       | 120.85,                                                                               | 97.94, 98.74,                                                                         |

|                                     |                               |                          |                                 |                                         |                                  |
|-------------------------------------|-------------------------------|--------------------------|---------------------------------|-----------------------------------------|----------------------------------|
|                                     | 4.63, 74.70,<br>86.81         | 2.64,<br>161.30          | 139.07, 142.25                  | 123.18,<br>126.25,<br>126.45            | 102.82, 103.23                   |
| <sup>1</sup> TICT                   | 17.44, 62.58,<br>78.07, 81.86 | 3.71, 7.48,<br>172.78    | 28.97, 44.60,<br>155.73, 163.65 | 118.34,<br>123.70,<br>125.57,<br>126.01 | 98.81, 99.26,<br>105.12, 108.22, |
| <sup>3</sup> LE (T <sub>1</sub> )   | 2.38, 3.45,<br>81.60, 82.67,  | 4.16, 18.57,<br>179.91   | 33.90, 62.09,<br>125.31, 133.31 | 119.05,<br>124.49,<br>126.48,<br>126.78 | 95.78, 100.04,<br>101.36, 105.18 |
| <sup>3</sup> TICT (T <sub>1</sub> ) | 22.83, 32.52,<br>75.70, 83.31 | 12.34, 23.99,<br>176.13, | 39.47, 42.93,<br>146.95, 171.03 | 120.85,<br>122.75,<br>123.09,<br>125.13 | 96.26, 98.50,<br>101.90, 102.05  |

Table S12 – 0-0 transition wavelengths and energies, calculated by B2PLYP for **1** and **2** and by PBE0 for **3** over equilibrium excited state geometries.

| State character   | S <sub>1</sub> |          | T <sub>1</sub>                   |                                  | T <sub>2</sub> |                |
|-------------------|----------------|----------|----------------------------------|----------------------------------|----------------|----------------|
| <b>Compound 1</b> |                |          |                                  |                                  |                |                |
| LE                | 431.5 nm       | 2.874 eV | 531.2 nm<br>(546.9) <sup>1</sup> | 2.334 eV<br>(2.267) <sup>1</sup> | 425.5 nm       | 2.914 eV       |
| TICT              | 701.9 nm       | 1.767 eV | 497.3 nm                         | 2.493 eV                         | 401.0 nm       | 3.092 eV       |
| <b>Compound 2</b> |                |          |                                  |                                  |                |                |
| LE                | 393.0 nm       | 3.155 eV | 547.8 nm                         | 2.263 eV                         | – <sup>2</sup> | – <sup>2</sup> |
| TICT              | 697.1 nm       | 1.779 eV | 547.4 nm                         | 2.265 eV                         | – <sup>2</sup> | – <sup>2</sup> |
| <b>Compound 3</b> |                |          |                                  |                                  |                |                |
| LE                | 408.7 nm       | 3.034 eV | 557.7 nm                         | 2.223 eV                         | – <sup>2</sup> | – <sup>2</sup> |
| TICT              | 700.8 nm       | 1.769 eV | 609.7 <sup>1</sup> nm            | 2.034 <sup>1</sup> eV            | – <sup>2</sup> | – <sup>2</sup> |

<sup>1</sup>Geometry optimized by UPBE0/def2-TZVP(-f)

<sup>2</sup>No data

## Spin-orbital coupling matrix coefficients

Table S13 - Selected SOCME values for **1** (TDA-PBE0, RI-SOMF(1x))

| Transition                      | SOC, cm <sup>-1</sup> | Transition                      | SOC, cm <sup>-1</sup> | Transition                      | SOC, cm <sup>-1</sup> |
|---------------------------------|-----------------------|---------------------------------|-----------------------|---------------------------------|-----------------------|
| S <sub>0</sub> →T <sub>1</sub>  | 2.62                  | S <sub>7</sub> →T <sub>4</sub>  | 2.05                  | S <sub>8</sub> →T <sub>7</sub>  | 4.18                  |
| S <sub>2</sub> →T <sub>1</sub>  | 2.90                  | S <sub>0</sub> →T <sub>5</sub>  | 11.80                 | S <sub>9</sub> →T <sub>7</sub>  | 4.04                  |
| S <sub>3</sub> →T <sub>1</sub>  | 5.31                  | S <sub>1</sub> →T <sub>5</sub>  | 1.42                  | S <sub>10</sub> →T <sub>7</sub> | 2.38                  |
| S <sub>6</sub> →T <sub>1</sub>  | 1.25                  | S <sub>2</sub> →T <sub>5</sub>  | 4.07                  | S <sub>0</sub> →T <sub>8</sub>  | 3.36                  |
| S <sub>7</sub> →T <sub>1</sub>  | 1.71                  | S <sub>3</sub> →T <sub>5</sub>  | 3.39                  | S <sub>1</sub> →T <sub>8</sub>  | 1.59                  |
| S <sub>8</sub> →T <sub>1</sub>  | 1.41                  | S <sub>4</sub> →T <sub>5</sub>  | 2.69                  | S <sub>2</sub> →T <sub>8</sub>  | 2.56                  |
| S <sub>9</sub> →T <sub>1</sub>  | 1.37                  | S <sub>5</sub> →T <sub>5</sub>  | 1.47                  | S <sub>3</sub> →T <sub>8</sub>  | 1.72                  |
| S <sub>0</sub> →T <sub>2</sub>  | 2.04                  | S <sub>9</sub> →T <sub>5</sub>  | 1.34                  | S <sub>7</sub> →T <sub>8</sub>  | 1.01                  |
| S <sub>1</sub> →T <sub>2</sub>  | 1.16                  | S <sub>10</sub> →T <sub>5</sub> | 1.69                  | S <sub>8</sub> →T <sub>8</sub>  | 2.58                  |
| S <sub>3</sub> →T <sub>2</sub>  | 1.28                  | S <sub>0</sub> →T <sub>6</sub>  | 8.34                  | S <sub>0</sub> →T <sub>9</sub>  | 12.22                 |
| S <sub>0</sub> →T <sub>3</sub>  | 32.59                 | S <sub>1</sub> →T <sub>6</sub>  | 2.16                  | S <sub>1</sub> →T <sub>9</sub>  | 1.17                  |
| S <sub>1</sub> →T <sub>3</sub>  | 2.32                  | S <sub>2</sub> →T <sub>6</sub>  | 2.62                  | S <sub>2</sub> →T <sub>9</sub>  | 2.05                  |
| S <sub>2</sub> →T <sub>3</sub>  | 2.36                  | S <sub>3</sub> →T <sub>6</sub>  | 2.77                  | S <sub>4</sub> →T <sub>9</sub>  | 2.90                  |
| S <sub>4</sub> →T <sub>3</sub>  | 3.44                  | S <sub>4</sub> →T <sub>6</sub>  | 1.51                  | S <sub>6</sub> →T <sub>9</sub>  | 1.01                  |
| S <sub>6</sub> →T <sub>3</sub>  | 1.35                  | S <sub>5</sub> →T <sub>6</sub>  | 3.47                  | S <sub>8</sub> →T <sub>9</sub>  | 3.12                  |
| S <sub>7</sub> →T <sub>3</sub>  | 1.56                  | S <sub>8</sub> →T <sub>6</sub>  | 1.62                  | S <sub>9</sub> →T <sub>9</sub>  | 1.26                  |
| S <sub>8</sub> →T <sub>3</sub>  | 4.51                  | S <sub>9</sub> →T <sub>6</sub>  | 1.20                  | S <sub>10</sub> →T <sub>9</sub> | 3.86                  |
| S <sub>9</sub> →T <sub>3</sub>  | 1.58                  | S <sub>0</sub> →T <sub>7</sub>  | 18.67                 | S <sub>0</sub> →T <sub>10</sub> | 15.95                 |
| S <sub>10</sub> →T <sub>3</sub> | 3.05                  | S <sub>1</sub> →T <sub>7</sub>  | 7.29                  | S <sub>1</sub> →T <sub>10</sub> | 1.29                  |
| S <sub>0</sub> →T <sub>4</sub>  | 3.51                  | S <sub>3</sub> →T <sub>7</sub>  | 5.07                  | S <sub>2</sub> →T <sub>10</sub> | 3.17                  |
| S <sub>1</sub> →T <sub>4</sub>  | 2.24                  | S <sub>4</sub> →T <sub>7</sub>  | 4.25                  | S <sub>4</sub> →T <sub>10</sub> | 1.54                  |
| S <sub>2</sub> →T <sub>4</sub>  | 4.19                  | S <sub>5</sub> →T <sub>7</sub>  | 10.24                 | S <sub>6</sub> →T <sub>10</sub> | 1.30                  |
| S <sub>3</sub> →T <sub>4</sub>  | 8.37                  | S <sub>6</sub> →T <sub>7</sub>  | 2.91                  | S <sub>8</sub> →T <sub>10</sub> | 1.12                  |
| S <sub>6</sub> →T <sub>4</sub>  | 1.95                  |                                 |                       |                                 |                       |

Table S14 - Selected SOCME values for **2** (TDA-PBE0, RI-SOMF(1x))

| Transition                      | SOC, cm <sup>-1</sup> | Transition                     | SOC, cm <sup>-1</sup> | Transition                      | SOC, cm <sup>-1</sup> |
|---------------------------------|-----------------------|--------------------------------|-----------------------|---------------------------------|-----------------------|
| S <sub>0</sub> →T <sub>1</sub>  | 1.56                  | S <sub>6</sub> →T <sub>4</sub> | 3.09                  | S <sub>8</sub> →T <sub>7</sub>  | 1.61                  |
| S <sub>1</sub> →T <sub>1</sub>  | 1.12                  | S <sub>0</sub> →T <sub>5</sub> | 11.95                 | S <sub>9</sub> →T <sub>7</sub>  | 1.00                  |
| S <sub>2</sub> →T <sub>1</sub>  | 2.17                  | S <sub>1</sub> →T <sub>5</sub> | 1.91                  | S <sub>10</sub> →T <sub>7</sub> | 1.07                  |
| S <sub>4</sub> →T <sub>1</sub>  | 3.85                  | S <sub>2</sub> →T <sub>5</sub> | 1.42                  | S <sub>0</sub> →T <sub>8</sub>  | 11.98                 |
| S <sub>5</sub> →T <sub>1</sub>  | 1.42                  | S <sub>3</sub> →T <sub>5</sub> | 1.09                  | S <sub>1</sub> →T <sub>8</sub>  | 2.20                  |
| S <sub>6</sub> →T <sub>1</sub>  | 2.44                  | S <sub>4</sub> →T <sub>5</sub> | 3.63                  | S <sub>4</sub> →T <sub>8</sub>  | 1.29                  |
| S <sub>0</sub> →T <sub>2</sub>  | 1.47                  | S <sub>5</sub> →T <sub>5</sub> | 5.40                  | S <sub>5</sub> →T <sub>8</sub>  | 4.09                  |
| S <sub>1</sub> →T <sub>2</sub>  | 1.23                  | S <sub>6</sub> →T <sub>5</sub> | 3.11                  | S <sub>6</sub> →T <sub>8</sub>  | 1.91                  |
| S <sub>3</sub> →T <sub>2</sub>  | 3.50                  | S <sub>7</sub> →T <sub>5</sub> | 1.17                  | S <sub>8</sub> →T <sub>8</sub>  | 3.17                  |
| S <sub>5</sub> →T <sub>2</sub>  | 8.03                  | S <sub>0</sub> →T <sub>6</sub> | 6.33                  | S <sub>0</sub> →T <sub>9</sub>  | 10.12                 |
| S <sub>6</sub> →T <sub>2</sub>  | 3.52                  | S <sub>2</sub> →T <sub>6</sub> | 1.79                  | S <sub>1</sub> →T <sub>9</sub>  | 1.20                  |
| S <sub>7</sub> →T <sub>2</sub>  | 1.27                  | S <sub>3</sub> →T <sub>6</sub> | 1.05                  | S <sub>2</sub> →T <sub>9</sub>  | 2.51                  |
| S <sub>8</sub> →T <sub>2</sub>  | 2.89                  | S <sub>4</sub> →T <sub>6</sub> | 2.52                  | S <sub>4</sub> →T <sub>9</sub>  | 1.17                  |
| S <sub>10</sub> →T <sub>2</sub> | 2.00                  | S <sub>5</sub> →T <sub>6</sub> | 5.20                  | S <sub>5</sub> →T <sub>9</sub>  | 1.06                  |

|                       |      |                       |       |                          |      |
|-----------------------|------|-----------------------|-------|--------------------------|------|
| $S_0 \rightarrow T_3$ | 3.56 | $S_6 \rightarrow T_6$ | 1.14  | $S_6 \rightarrow T_9$    | 3.38 |
| $S_2 \rightarrow T_3$ | 1.18 | $S_8 \rightarrow T_6$ | 1.54  | $S_8 \rightarrow T_9$    | 1.47 |
| $S_3 \rightarrow T_3$ | 2.20 | $S_0 \rightarrow T_7$ | 10.84 | $S_9 \rightarrow T_9$    | 2.21 |
| $S_5 \rightarrow T_3$ | 1.61 | $S_1 \rightarrow T_7$ | 4.45  | $S_0 \rightarrow T_{10}$ | 6.51 |
| $S_8 \rightarrow T_3$ | 1.15 | $S_3 \rightarrow T_7$ | 1.91  | $S_2 \rightarrow T_{10}$ | 2.79 |
| $S_9 \rightarrow T_3$ | 2.37 | $S_4 \rightarrow T_7$ | 1.07  | $S_5 \rightarrow T_{10}$ | 3.86 |
| $S_0 \rightarrow T_4$ | 3.04 | $S_5 \rightarrow T_7$ | 5.65  | $S_7 \rightarrow T_{10}$ | 1.21 |
| $S_4 \rightarrow T_4$ | 1.68 | $S_6 \rightarrow T_7$ | 6.99  | $S_8 \rightarrow T_{10}$ | 1.34 |
| $S_5 \rightarrow T_4$ | 1.40 | $S_7 \rightarrow T_7$ | 2.51  | $S_9 \rightarrow T_{10}$ | 1.37 |

Table S15 - Selected SOCME values for **3** (TDA-PBE0, RI-SOMF(1x))

| Transition               | SOC, $\text{cm}^{-1}$ | Transition               | SOC, $\text{cm}^{-1}$ | Transition                  | SOC, $\text{cm}^{-1}$ |
|--------------------------|-----------------------|--------------------------|-----------------------|-----------------------------|-----------------------|
| $S_5 \rightarrow T_1$    | 1.46                  | $S_6 \rightarrow T_4$    | 1.69                  | $S_5 \rightarrow T_8$       | 2.07                  |
| $S_6 \rightarrow T_1$    | 1.35                  | $S_{10} \rightarrow T_4$ | 1.74                  | $S_6 \rightarrow T_8$       | 2.04                  |
| $S_7 \rightarrow T_1$    | 1.80                  | $S_0 \rightarrow T_5$    | 1.56                  | $S_7 \rightarrow T_8$       | 1.79                  |
| $S_8 \rightarrow T_1$    | 1.53                  | $S_8 \rightarrow T_5$    | 1.37                  | $S_8 \rightarrow T_8$       | 1.41                  |
| $S_9 \rightarrow T_1$    | 4.06                  | $S_9 \rightarrow T_5$    | 1.07                  | $S_9 \rightarrow T_8$       | 3.79                  |
| $S_1 \rightarrow T_2$    | 1.19                  | $S_0 \rightarrow T_6$    | 1.73                  | $S_0 \rightarrow T_9$       | 2.26                  |
| $S_4 \rightarrow T_2$    | 3.08                  | $S_1 \rightarrow T_6$    | 1.19                  | $S_1 \rightarrow T_9$       | 1.70                  |
| $S_5 \rightarrow T_2$    | 3.38                  | $S_2 \rightarrow T_6$    | 4.25                  | $S_4 \rightarrow T_9$       | 1.41                  |
| $S_6 \rightarrow T_2$    | 2.94                  | $S_3 \rightarrow T_6$    | 3.35                  | $S_5 \rightarrow T_9$       | 2.78                  |
| $S_{10} \rightarrow T_2$ | 6.77                  | $S_6 \rightarrow T_6$    | 0.93                  | $S_6 \rightarrow T_9$       | 2.66                  |
| $S_0 \rightarrow T_3$    | 0.94                  | $S_7 \rightarrow T_6$    | 3.71                  | $S_{10} \rightarrow T_9$    | 5.63                  |
| $S_7 \rightarrow T_3$    | 2.13                  | $S_0 \rightarrow T_7$    | 3.13                  | $S_0 \rightarrow T_{10}$    | 4.01                  |
| $S_9 \rightarrow T_3$    | 1.16                  | $S_3 \rightarrow T_7$    | 1.04                  | $S_1 \rightarrow T_{10}$    | 3.97                  |
| $S_0 \rightarrow T_4$    | 4.31                  | $S_7 \rightarrow T_7$    | 2.88                  | $S_4 \rightarrow T_{10}$    | 1.29                  |
| $S_1 \rightarrow T_4$    | 2.08                  | $S_8 \rightarrow T_7$    | 4.84                  | $S_5 \rightarrow T_{10}$    | 2.23                  |
| $S_4 \rightarrow T_4$    | 0.93                  | $S_9 \rightarrow T_7$    | 2.16                  | $S_6 \rightarrow T_{10}$    | 1.54                  |
| $S_5 \rightarrow T_4$    | 2.01                  | $S_0 \rightarrow T_8$    | 1.17                  | $S_{10} \rightarrow T_{10}$ | 2.53                  |



## Single-crystal X-Ray diffraction data

Table S16. Crystal data and structure refinement for compounds **1–3**.

| Identification code                         | <b>1</b>                                                      | <b>2</b>                                                       | <b>3</b>                                                                     |
|---------------------------------------------|---------------------------------------------------------------|----------------------------------------------------------------|------------------------------------------------------------------------------|
| Empirical formula                           | C <sub>25</sub> H <sub>19</sub> N <sub>2</sub> PS             | C <sub>32</sub> H <sub>23</sub> N <sub>4</sub> PS <sub>2</sub> | C <sub>51</sub> H <sub>36</sub> N <sub>6</sub> P <sub>2</sub> S <sub>3</sub> |
| Formula weight                              | 410.45                                                        | 558.63                                                         | 890.98                                                                       |
| Temperature/K                               | 150(2)                                                        | 150(2)                                                         | 150(2)                                                                       |
| Space group                                 | <i>P</i> 2 <sub>1</sub> / <i>n</i>                            | <i>P</i> 2 <sub>1</sub> / <i>c</i>                             | <i>P</i> -1                                                                  |
| a/Å                                         | 9.1649(2)                                                     | 11.8294(3)                                                     | 11.3435(2)                                                                   |
| b/Å                                         | 21.8384(4)                                                    | 28.4993(8)                                                     | 11.9478(2)                                                                   |
| c/Å                                         | 10.3694(2)                                                    | 7.9989(2)                                                      | 17.8044(4)                                                                   |
| α/°                                         | 90                                                            | 90                                                             | 77.3170(10)                                                                  |
| β/°                                         | 101.1510(10)                                                  | 100.2360(10)                                                   | 88.6900(10)                                                                  |
| γ/°                                         | 90                                                            | 90                                                             | 64.310(2)                                                                    |
| Volume/Å <sup>3</sup>                       | 2036.22(7)                                                    | 2653.75(12)                                                    | 2114.26(8)                                                                   |
| Z                                           | 4                                                             | 4                                                              | 2                                                                            |
| ρ <sub>calc</sub> /g/cm <sup>3</sup>        | 1.339                                                         | 1.398                                                          | 1.400                                                                        |
| μ/mm <sup>-1</sup>                          | 0.252                                                         | 0.292                                                          | 0.297                                                                        |
| F(000)                                      | 856.0                                                         | 1160.0                                                         | 924.0                                                                        |
| Crystal size/mm <sup>3</sup>                | 0.13 × 0.1 × 0.07                                             | 0.15 × 0.13 × 0.08                                             | 0.16 × 0.13 × 0.1                                                            |
| Crystal colour                              | pale yellow                                                   | colourless                                                     | pale yellow                                                                  |
| Radiation                                   | MoKα (λ = 0.71073)                                            | MoKα (λ = 0.71073)                                             | MoKα (λ = 0.71073)                                                           |
| 2θ range for data collection/°              | 3.73 to 57.428                                                | 4.518 to 55.788                                                | 4.178 to 52.764                                                              |
| Index ranges                                | -12 ≤ h ≤ 12, -29 ≤ k ≤ 29, -14 ≤ l ≤ 14                      | -15 ≤ h ≤ 15, -37 ≤ k ≤ 37, -10 ≤ l ≤ 10                       | -14 ≤ h ≤ 14, -14 ≤ k ≤ 14, -22 ≤ l ≤ 22                                     |
| Reflections collected                       | 24167                                                         | 33626                                                          | 25570                                                                        |
| Independent reflections                     | 5269 [R <sub>int</sub> = 0.0326, R <sub>sigma</sub> = 0.0287] | 6348 [R <sub>int</sub> = 0.0379, R <sub>sigma</sub> = 0.0288]  | 8605 [R <sub>int</sub> = 0.0330, R <sub>sigma</sub> = 0.0401]                |
| Data/restraints/parameters                  | 5269/1/265                                                    | 6348/2/358                                                     | 8605/178/647                                                                 |
| Goodness-of-fit on F <sup>2</sup>           | 1.033                                                         | 1.039                                                          | 1.040                                                                        |
| Final R indexes [I ≥ 2σ (I)]                | R <sub>1</sub> = 0.0367, wR <sub>2</sub> = 0.0923             | R <sub>1</sub> = 0.0343, wR <sub>2</sub> = 0.0843              | R <sub>1</sub> = 0.0387, wR <sub>2</sub> = 0.0889                            |
| Final R indexes [all data]                  | R <sub>1</sub> = 0.0460, wR <sub>2</sub> = 0.0985             | R <sub>1</sub> = 0.0421, wR <sub>2</sub> = 0.0898              | R <sub>1</sub> = 0.0497, wR <sub>2</sub> = 0.0966                            |
| Largest diff. peak/hole / e Å <sup>-3</sup> | 0.32/-0.28                                                    | 0.32/-0.29                                                     | 0.33/-0.33                                                                   |
